# Supplementary material for: Endosomal regulation of contact inhibition through the AMOT:YAP pathway
Source: PubMed Central journal article supplement — Mol Biol Cell. 2015 Jul 15;26(14):2673–84. doi: 10.1091/mbc.E15-04-0224 (PMC4501364; doi:10.1091/mbc.e15-04-0224), 2015-07-15
Supplement: supp_E15-04-0224v1_CombinedSupMats.pdf [file supp_E15-04-0224v1_CombinedSupMats.pdf]

# Supplemental Materials

*Molecular Biology of the Cell*

Cox et al.

Figure S1

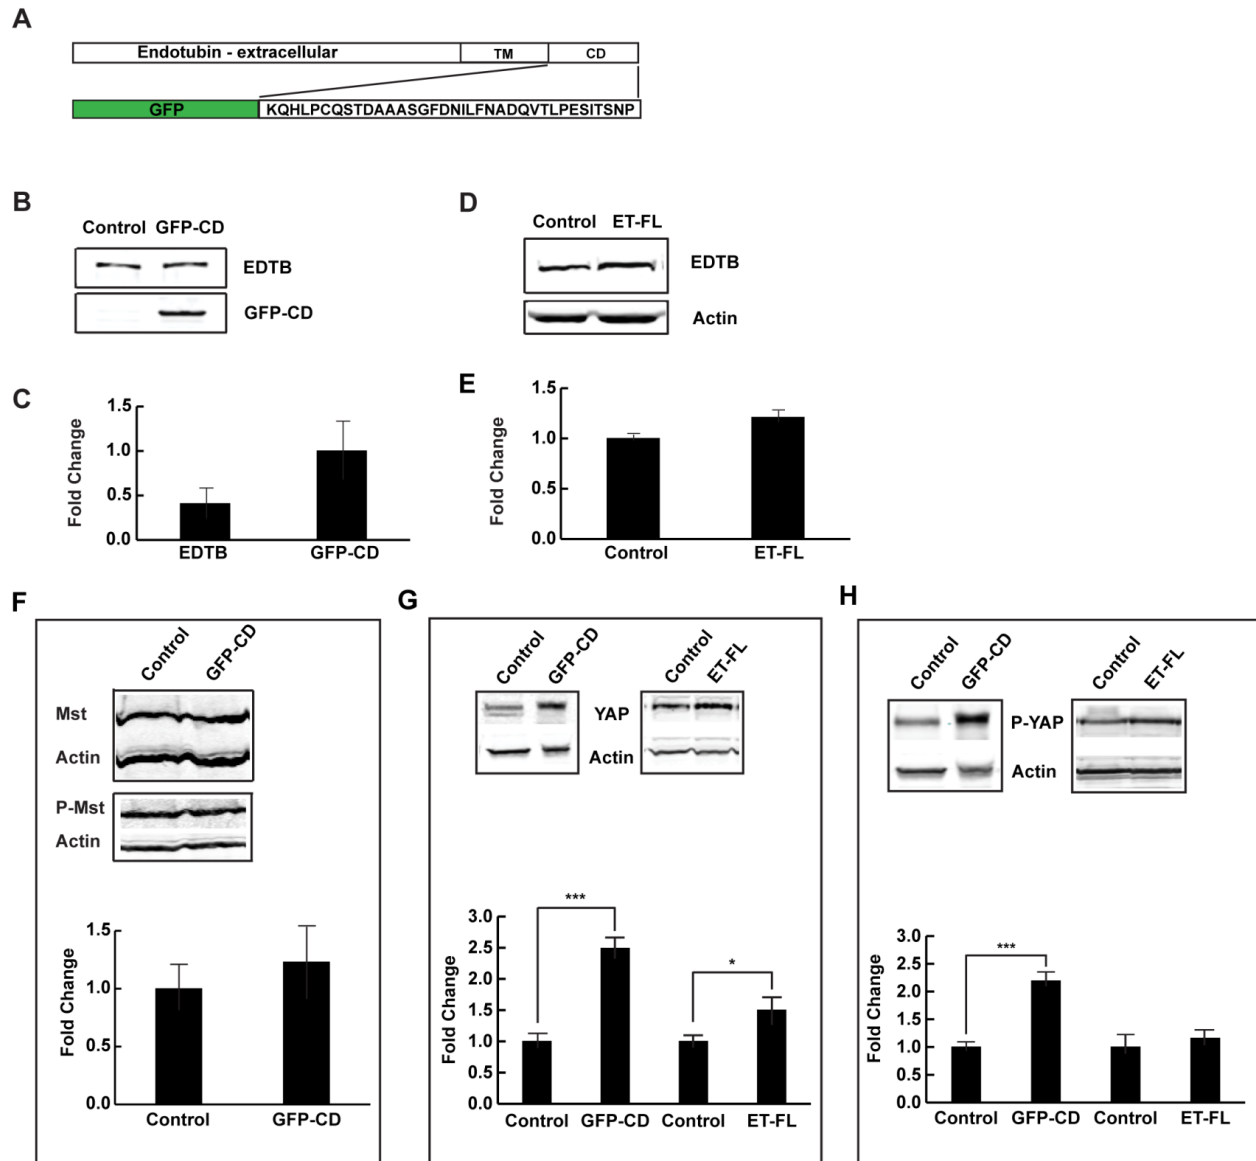

Figure S1. Relative levels of GFP-CD and ET-FL compared to endogenous EDTB. (A) Diagram of GFP-CD construct used in many experiments. GFP was fused to the N-terminal of the EDTB cytoplasmic domain. (B, C) The expression of GFP-CD in stable cell lines was determined by Western blot analysis and quantified using LiCor Odyssey imaging. (D, E) The expression of ET-FL from stable cell lines was determined as above. (F) Expression of Mst and p-Mst in cells expressing GFP-CD (G, H) Expression of YAP and phospho-YAP in cells expressing GFP-CD or ET-FL. Error bars, SEM. \*\*\* $p < 0.005$ , \* $p < 0.05$  based on t-test analysis.

Figure S2

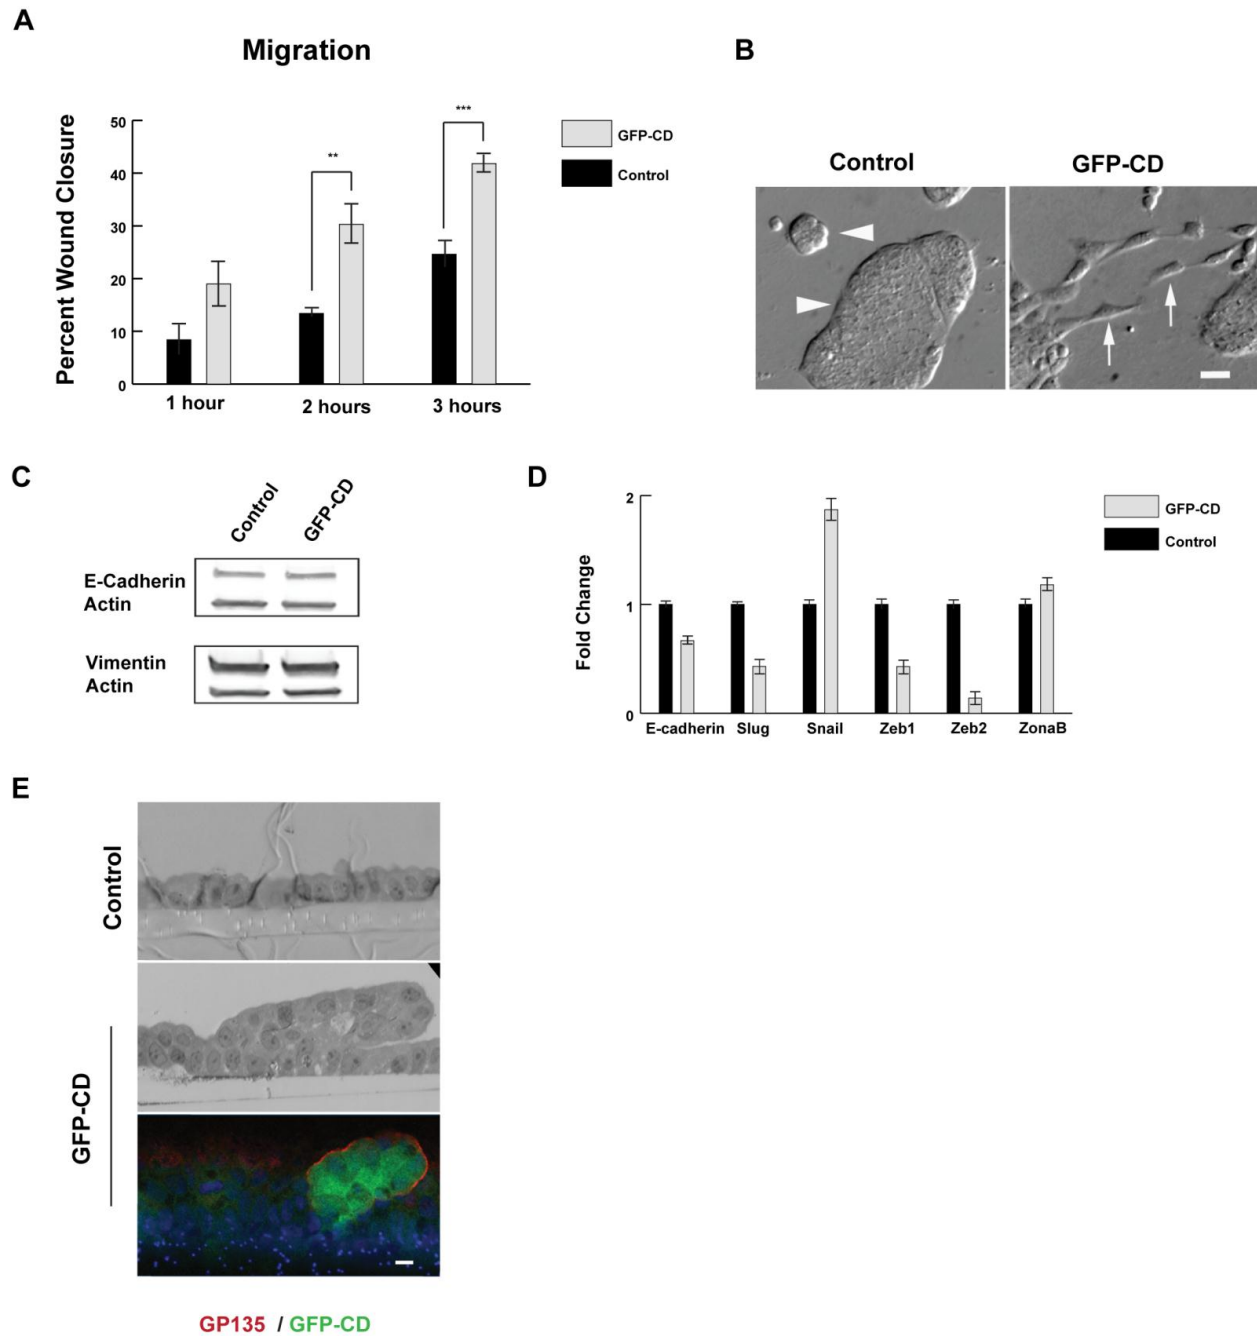

Figure S2. GFP-CD expressing cells migrate more quickly than control cells but this increased migration rate is not due to epithelial to mesenchymal transition. (A) Confluent monolayers of MDCK control or GFP-CD expressing cells were wounded using a pipet tip and the percentage wound closure was measured. GFP-CD expressing cells migrate more quickly than control cells. Error bars, SEM. \*\* $p < 0.01$ , \*\*\* $p < 0.005$  based on t-test analysis. (B) To test for an epithelial to

mesenchymal transition, MDCK control and GFP-CD cells were plated on collagen matrix. Control MDCK's remain as compact colonies (arrowheads) while the GFP-CD expressing cells form spindle-shaped cells (arrows). The MDCK control and GFP-CD expressing cells do not invade the matrix. Scale bar, 20 $\mu$ m. (C) MDCK control and GFP-CD lysates were analyzed by western blot for expression of the epithelial marker E-cadherin and the mesenchymal marker vimentin. There is no change in the expression of the markers when GFP-CD is expressed. (D) Quantitative PCR of control and GFP-CD expressing MDCK cells shows an increase in the transcription factor Snail and no increase in the Zeb transcription factors. Error bars, SEM. (E) GFP-CD cells grown on Transwell filters lose contact inhibition. GFP-CD expressing cells form polyp-like structures with strong GFP expression and maintain expression of the apical marker GP135. Scale bar, 20 $\mu$ m.

**Figure S3**

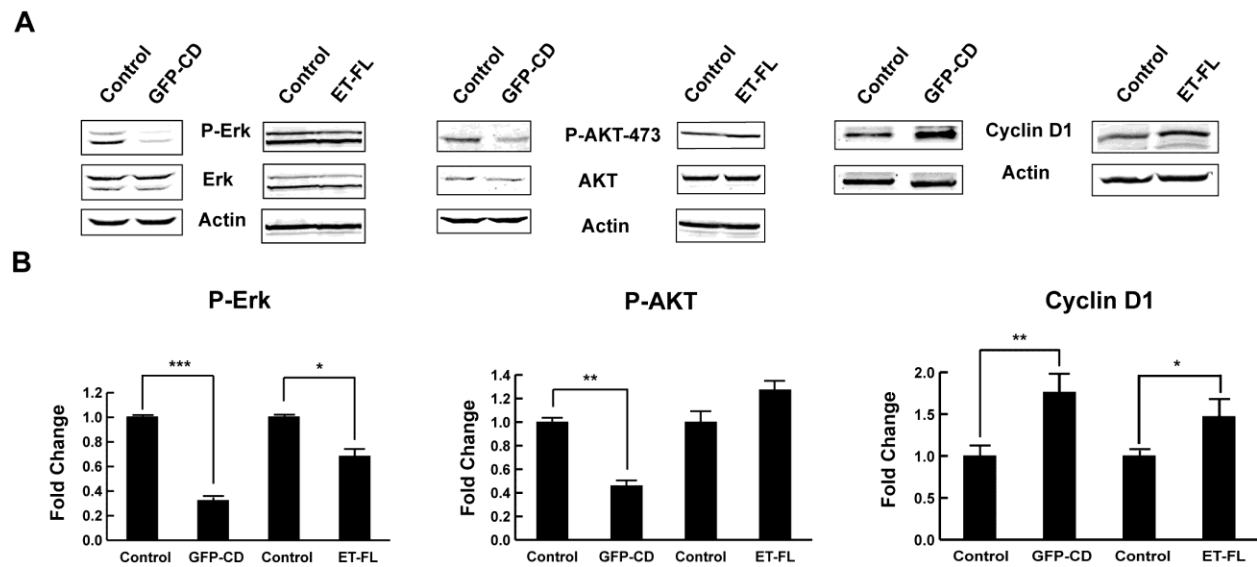

Figure S3. EDTB over-expression results in increased cyclin D1 independent of MAPK and AKT pathway activation. (A, B) MDCK cells expressing full-length or the cytoplasmic domain of EDTB were analyzed by western blot for pathway activation. Error bars, SEM, \* $p < 0.05$ , \*\* $p < 0.01$ , \*\*\* $p < 0.005$  based on t-test analysis.

**LIHC EDTB rsem values (T/N)**

| <b>Sample ID</b> | <b>Stage</b> | <b>Tumor</b> | <b>Normal</b> | <b>Fold Change</b> |
|------------------|--------------|--------------|---------------|--------------------|
| TCGA-FV-A2QR     | Stage I      | 4187         | 184           | 22.76              |
| TCGA-DD-A1EH     | Stage III    | 6206         | 643           | 9.65               |
| TCGA-DD-A118     | Stage I      | 3885         | 436           | 8.91               |
| TCGA-BD-A2L6     | NA           | 835          | 134           | 6.23               |
| TCGA-DD-A3A2     | Stage I      | 4062         | 676           | 6.01               |
| TCGA-DD-A11A     | Stage I      | 204          | 64            | 3.19               |
| TCGA-ES-A2HT     | Stage I      | 1688         | 585           | 2.99               |
| TCGA-DD-A3A3     | Stage I      | 102          | 51            | 2.00               |

Table S1. EDTB is upregulated in a subset of LIHC. RSEM normalized values of tumor and normal adjacent tissue from 48 pairs were analyzed for changes in EDTB expression. There is a 2 fold or greater increase in 8 tumor samples.

**Stage distribution of EDTB expression in LIHC samples.**

|                     | <b>Low</b> | <b>Medium</b> | <b>High</b> |
|---------------------|------------|---------------|-------------|
| <b>Stage I</b>      | 11         | 13            | 19          |
| <b>Stage II</b>     | 9          | 10            | 6           |
| <b>Stage III/IV</b> | 15         | 12            | 10          |

Table S2. Binning of EDTB expression values in LIHC tumor samples. Binning of rsem values into 3 equal groups based on expression of EDTB shows an increase in the percentage of Stage I tumors with high expression. 44% of stage I tumors express EDTB at high levels and 26% are low expressors. This trend is reversed for the stage III/IV tumors. In these tumors 27% are high expressors while 41% express EDTB at low levels.
